# Supplementary material for: One Health Approach to Tackle Microbial Contamination on Poultries—A Systematic Review
Source: MDPI journal article supplement (doi:10.3390/toxics11040374), 2023-04-14
Supplement: s1 [file s1]

# One Health Approach to Tackle Microbial Contamination on Poultry—A Systematic Review

Bianca Gomes <sup>1,2,\*</sup>, Marta Dias <sup>2,3</sup>, Renata Cervantes <sup>2,3</sup>, Pedro Pena <sup>2,3</sup>, Joana Santos <sup>4</sup>, Marta Vasconcelos Pinto <sup>5,6</sup> and Carla Viegas <sup>2,3</sup>

**Table S1.** PRISMA Checklist (Adopted from [14]).

| Section/Topic                      | #  | Checklist Item                                                                                                                                                                                                                                                                                              | Reported On Page # |
|------------------------------------|----|-------------------------------------------------------------------------------------------------------------------------------------------------------------------------------------------------------------------------------------------------------------------------------------------------------------|--------------------|
| <b>Title</b>                       |    |                                                                                                                                                                                                                                                                                                             |                    |
| Title                              | 1  | Identify the report as a systematic review, meta-analyses.                                                                                                                                                                                                                                                  | 1                  |
| <b>Abstract</b>                    |    |                                                                                                                                                                                                                                                                                                             |                    |
| Structured Summary                 | 2  | Provide a structured summary including, as applicable: background; objectives; data sources; study eligibility criteria, participants, and interventions; study appraisal and synthesis methods; results; limitations; conclusions and implications of key findings; systematic review registration number. | 1                  |
| <b>Introduction</b>                |    |                                                                                                                                                                                                                                                                                                             |                    |
| Rationale                          | 3  | Describe the rationale for the review in the context of what is already known.                                                                                                                                                                                                                              | 2 and 3            |
| Objectives                         | 4  | Provide an explicit statement of questions being addressed with reference to participants, interventions, comparisons, outcomes, and study design (PICOS).                                                                                                                                                  | 3                  |
| <b>Methods</b>                     |    |                                                                                                                                                                                                                                                                                                             |                    |
| Protocol and Registration          | 5  | Indicate if a review protocol exists, if and where it can be accessed (e.g., Web address), and, if available, provide registration information including registration number.                                                                                                                               | 3                  |
| Eligibility Criteria               | 6  | Specify study characteristics (e.g., PICOS, length of follow-up) and report characteristics (e.g., years considered, language, publication status) used as criteria for eligibility, giving rationale.                                                                                                      | 3                  |
| Information Sources                | 7  | Describe all information sources (e.g., databases with dates of coverage, contact with study authors to identify additional studies) in the search and date last searched.                                                                                                                                  | 3                  |
| Search                             | 8  | Present full electronic search strategy for at least one database, including any limits used, such that it could be repeated.                                                                                                                                                                               | 4                  |
| Study Selection                    | 9  | State the process for selecting studies (i.e., screening, eligibility, included in systematic review, and, if applicable, included in the meta-analysis).                                                                                                                                                   | 4                  |
| Data Collection Process            | 10 | Describe method of data extraction from reports (e.g., piloted forms, independently, in duplicate) and any processes for obtaining and confirming data from investigators.                                                                                                                                  | 4                  |
| Data Items                         | 11 | List and define all variables for which data were sought (e.g., PICOS, funding sources) and any assumptions and simplifications made.                                                                                                                                                                       | 4                  |
| Risk of Bias in Individual Studies | 12 | Describe methods used for assessing risk of bias of individual studies (including specification of whether this was done at the study or                                                                                                                                                                    | 4                  |

|                               |    |                                                                                                                                                                                                           |                |
|-------------------------------|----|-----------------------------------------------------------------------------------------------------------------------------------------------------------------------------------------------------------|----------------|
|                               |    | outcome level), and how this information is to be used in any data synthesis.                                                                                                                             |                |
| Summary Measures              | 13 | State the principal summary measures (e.g., risk ratio, difference in means).                                                                                                                             | 4              |
| Synthesis of Results          | 14 | Describe the methods of handling data and combining results of studies, if done, including measures of consistency (e.g., I <sup>2</sup> ) for each meta-analysis.                                        | 4              |
| Risk of Bias Across Studies   | 15 | Specify any assessment of risk of bias that may affect the cumulative evidence (e.g., publication bias, selective reporting within studies).                                                              | 4              |
| Additional Analyses           | 16 | Describe methods of additional analyses (e.g., sensitivity or subgroup analyses, meta-regression), if done, indicating which were pre-specified.                                                          | 4              |
| <b>Results</b>                |    |                                                                                                                                                                                                           |                |
| Study Selection               | 17 | Give numbers of studies screened, assessed for eligibility, and included in the review, with reasons for exclusions at each stage, ideally with a flow diagram.                                           | 4, Figure 1    |
| Study Characteristics         | 18 | For each study, present characteristics for which data were extracted (e.g., study size, PICOS, follow-up period) and provide the citations.                                                              | 6-34, Table 2  |
| Risk of Bias within Studies   | 19 | Present data on risk of bias of each study and, if available, any outcome level assessment (see item 12).                                                                                                 | 4              |
| Results of Individual Studies | 20 | For all outcomes considered (benefits or harms), present, for each study: (a) simple summary data for each intervention group, (b) effect estimates and confidence intervals, ideally with a forest plot. | Table 2        |
| Synthesis of Results          | 21 | Present results of each meta-analysis done, including confidence intervals and measures of consistency.                                                                                                   | Table 2        |
| Risk of Bias Across Studies   | 22 | Present results of any assessment of risk of bias across studies (see Item 15).                                                                                                                           | 4              |
| Additional Analysis           | 23 | Give results of additional analyses, if done (e.g., sensitivity or subgroup analyses, meta-regression (see Item 16)).                                                                                     | Not applicable |
| <b>Discussion</b>             |    |                                                                                                                                                                                                           |                |
| Summary of Evidence           | 24 | Summarize the main findings including the strength of evidence for each main outcome; consider their relevance to key groups (e.g., healthcare providers, users, and policy makers).                      | 35-37          |
| Limitations                   | 25 | Discuss limitations at study and outcome level (e.g., risk of bias), and at review level (e.g., incomplete retrieval of identified research, reporting bias).                                             | 38-39          |
| Conclusions                   | 26 | Provide a general interpretation of the results in the context of other evidence and implications for future research.                                                                                    | 39             |
| <b>Funding</b>                |    |                                                                                                                                                                                                           |                |
| Funding                       | 27 | Describe sources of funding for the systematic review and other support (e.g., supply of data); role of funders for the systematic review.                                                                | 39             |
